# Supplementary material for: New insights into GluT1 mechanics during glucose transfer
Source: PubMed Central journal article supplement (PMC6353926; doi:10.1038/s41598-018-37367-z), 2019-01-30
Supplement: 41598_2018_37367_MOESM1_ESM.pdf [file 41598_2018_37367_MOESM1_ESM.pdf]

# New insights into GluT1 mechanics during glucose transfer

Tatiana Galochkina<sup>1,+</sup>, Matthieu Ng Fuk Chong<sup>1,+</sup>, Lylia Challali<sup>1</sup>, Sonia Abbar<sup>1</sup>, and Catherine Etchebest<sup>1,\*</sup>

<sup>1</sup>Université Sorbonne Paris Cité, Université Paris Diderot, Inserm, INTS, Unité Biologie Intégrée du Globule Rouge UMR\_S1134, DSIMB, Laboratoire d'Excellence GR-Ex, Paris, 75739, France

\*catherine.etchebest@inserm.fr

+these authors contributed equally to this work

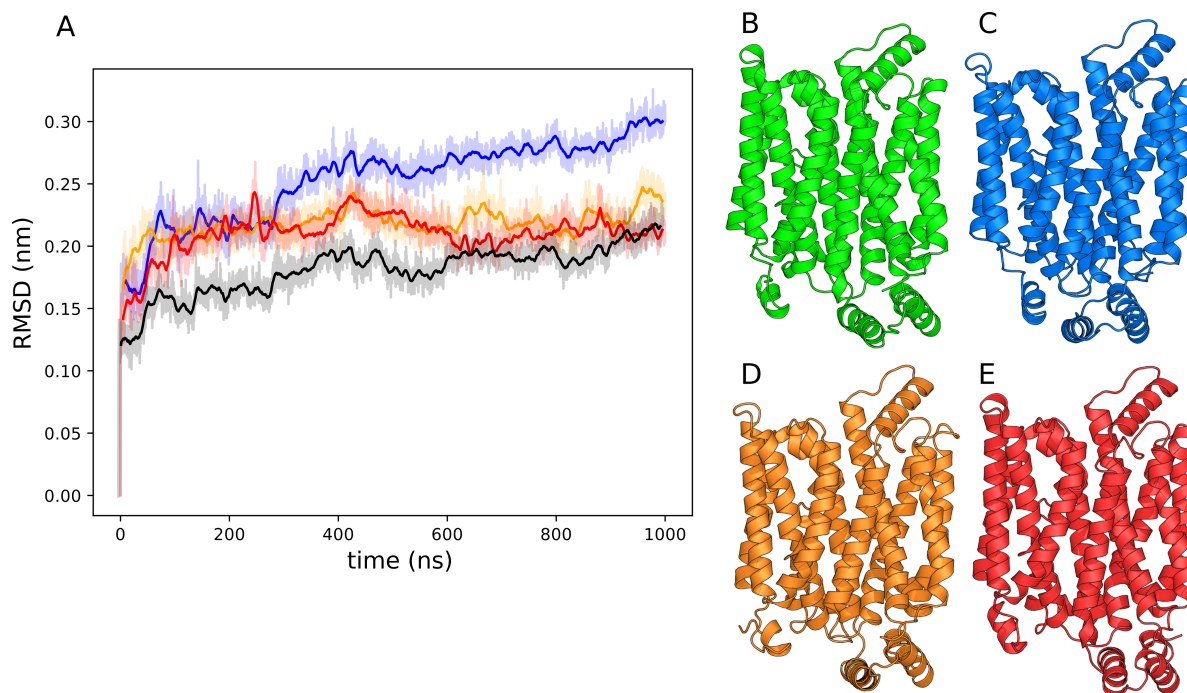

**Figure S1.** The RMSD calculated for  $C_{\alpha}$  atoms in three replicates of the MD simulation of GluT1 WT in the lipid bilayer (A), the reference X-ray structure (B) and the final protein conformations for each replicate (B,C,D) coloured similar to the corresponding RMSD plots. The blue line corresponds to the simulation when GluT1 undergoes transition from the inward facing to the outward facing state. For this trajectory we also provide the RMSD values calculated for the transmembrane part of the protein (black line).

**Table S1.** Available X-ray structures of the SP MFS proteins.

| Protein | Function                   | Organism                          | PDB ID | Resolution (Å) | Conformation                    | Ligand                                                                            | Ref. |
|---------|----------------------------|-----------------------------------|--------|----------------|---------------------------------|-----------------------------------------------------------------------------------|------|
| GLUT1   | D-glucose transporter      | <i>Homo sapiens</i>               | 4PYP   | 3.17           | Inward open                     | $\beta$ -Nonyl-glucoside                                                          | 1    |
|         |                            |                                   | 5EQG   | 2.9            | Inward open                     | Glut inhibitor (C <sub>25</sub> H <sub>25</sub> FN <sub>2</sub> O <sub>3</sub> )  | 2    |
|         |                            |                                   | 5EQH   | 2.99           | Inward open                     | Glut inhibitor (C <sub>26</sub> H <sub>27</sub> BrN <sub>2</sub> O <sub>3</sub> ) | 2    |
|         |                            |                                   | 5EQI   | 3.0            | Inward open                     | Cytochalasin B                                                                    | 2    |
| GLUT3   | D-glucose transporter      | <i>Homo sapiens</i>               | 5C65   | 2.65           | Outward open                    | —                                                                                 | —    |
|         |                            |                                   | 4ZW9   | 1.50           | Partly occluded, outward-facing | $\beta$ -D-Glucose, $\alpha$ -D-Glucose, 1-Oleoyl-R-glycerol                      | 3    |
|         |                            |                                   | 4ZWB   | 2.40           | Partly occluded, outward-facing | Maltose                                                                           | 3    |
|         |                            |                                   | 4ZWC   | 2.60           | Outward open                    | Maltose                                                                           | 3    |
| GLUT5   | D-fructose transporter     | <i>Bos taurus</i>                 | 4YB9   | 3.20           | Inward open                     | —                                                                                 | 4    |
|         |                            | <i>Rattus norvegicus</i>          | 4YBQ   | 3.27           | Outward open                    | —                                                                                 | 4    |
| Xyle    | D-xylose-proton symporter  | <i>Escherichia coli</i>           | 4GBY   | 2.81           | Partly occluded, outward-facing | $\beta$ -D-Xylose                                                                 | 5    |
|         |                            |                                   | 4GBZ   | 2.68           | Partly occluded, outward-facing | $\beta$ -D-Glucose                                                                | 5    |
|         |                            |                                   | 4GC0   | 2.60           | Partly occluded, outward-facing | 6-bromo-6-deoxy- $\beta$ -D-Glucose                                               | 5    |
|         |                            |                                   | 4JA3   | 3.80           | Partly occluded, inward-facing  | —                                                                                 | 6    |
|         |                            |                                   | 4JA4   | 4.20           | Inward open                     | —                                                                                 | 6    |
| GlcP    | D-glucose-proton symporter | <i>Staphylococcus epidermidis</i> | 4QIQ   | 3.51           | Inward open                     | —                                                                                 | 7    |
|         |                            |                                   | 4LDS   | 3.20           | Inward open                     | —                                                                                 | 8    |

## References

- Deng, D. *et al.* Crystal structure of the human glucose transporter GLUT1. *Nature* **510**, 121–125 (2014). DOI 10.1038/nature13306.
- Kapoor, K. *et al.* Mechanism of inhibition of human glucose transporter GLUT1 is conserved between cytochalasin B and phenylalanine amides. *Proc. Natl. Acad. Sci.* **113**, 4711–4716 (2016).
- Deng, D. *et al.* Molecular basis of ligand recognition and transport by glucose transporters. *Nature* **526**, 391–396 (2015).
- Nomura, N. *et al.* Structure and mechanism of the mammalian fructose transporter GLUT5. *Nature* **526**, 397–401 (2015).
- Sun, L. *et al.* Crystal structure of a bacterial homologue of glucose transporters GLUT1–4. *Nature* **490**, 361–366 (2012). DOI 10.1038/nature11524.
- Quistgaard, E. M., Löw, C., Moberg, P., Trésaugues, L. & Nordlund, P. Structural basis for substrate transport in the GLUT-homology family of monosaccharide transporters. *Nat. Struct. Mol. Biol.* **20**, 766–768 (2013). DOI 10.1038/nsmb.2569.
- Wisedchaisri, G., Park, M. S., Iadanza, M. G., Zheng, H. & Gonen, T. Proton-coupled sugar transport in the prototypical major facilitator superfamily protein Xyle. *Nat. Commun.* **5**, 1–11 (2014). DOI 10.1038/ncomms5521.
- Iancu, C. V., Zmoon, J., Bum, S., Aleshin, A. & Choe, J.-y. Crystal structure of a glucose / H<sup>+</sup> symporter and its mechanism of action. *Proc. Natl. Acad. Sci. U. S. A.* **110**, 17862–17867 (2013).

**Table S2.** Salt bridges observed during MD simulations for inward facing (IF) and outward facing (OF) states. Numbers reflect the percentage of the overall trajectory time for which the existence of the salt bridge was observed.

|         |         | IF apo | IF holo | OF apo | OF holo |         |         | IF apo | IF holo | OF apo | OF holo |
|---------|---------|--------|---------|--------|---------|---------|---------|--------|---------|--------|---------|
| 41 Glu  | 38 Lys  | 75.4   | 88.2    | 95.0   | 80.2    | 254 Glu | 249 Arg | 9.5    | 0.1     | –      | –       |
| 42 Glu  | 38 Lys  | 0.3    | 4.5     | 2.3    | 5.4     | 254 Glu | 253 Arg | 11.2   | 24.2    | 25.6   | 12.1    |
| 114 Lys | 42 Glu  | 0.1    | 0.9     | 1.1    | 0.1     | 255 Lys | 254 Glu | 13.2   | 6.0     | 3.0    | 4.1     |
| 120 Glu | 51 Arg  | 100.0  | 100.0   | 100.0  | 100.0   | 256 Lys | 247 Glu | 20.0   | 0.6     | –      | –       |
| 146 Glu | 92 Arg  | 99.8   | 100.0   | 100.0  | 100.0   | 261 Glu | 255 Lys | 26.7   | 13.3    | 2.9    | 3.8     |
| 177 Asp | 38 Lys  | 0.2    | 0.3     | 2.8    | 9.7     | 264 Arg | 254 Glu | –      | –       | 61.0   | –       |
| 183 Lys | 42 Glu  | 62.9   | 70.4    | 79.9   | 54.0    | 264 Arg | 261 Glu | 79.4   | 99.9    | 99.9   | 7.6     |
| 184 Asp | 114 Lys | 82.5   | 83.4    | 46.3   | 81.3    | 299 Glu | 38 Lys  | 79.4   | 76.4    | 89.3   | 13.8    |
| 184 Asp | 183 Lys | 31.9   | 26.1    | 27.1   | 41.5    | 300 Lys | 299 Glu | 4.3    | 4.8     | 9.0    | 10.2    |
| 209 Glu | 9 Thr   | 6.9    | –       | –      | –       | 329 Glu | 153 Arg | –      | 0.3     | 1.1    | 17.7    |
| 209 Glu | 11 Arg  | 5.2    | –       | –      | –       | 330 Arg | 329 Glu | –      | 5.3     | 0.7    | 14.2    |
| 209 Glu | 92 Arg  | –      | –       | 35.6   | 0.3     | 333 Arg | 329 Glu | 11.3   | 29.5    | 58.8   | 19.2    |
| 209 Glu | 93 Arg  | 92.4   | 96.4    | 95.7   | 44.1    | 393 Glu | 153 Arg | 0.0    | 13.9    | 74.2   | 94.6    |
| 212 Arg | 146 Glu | 89.8   | 84.5    | 0.0    | 2.0     | 393 Glu | 333 Arg | 100.0  | 100.0   | 100.0  | 100.0   |
| 218 Arg | 209 Glu | 1.1    | 4.4     | 0.5    | 2.1     | 400 Arg | 146 Glu | 0.1    | 0.5     | 57.3   | 6.0     |
| 220 Glu | 218 Arg | 55.1   | 78.8    | 69.1   | 84.9    | 400 Arg | 243 Glu | 50.2   | 0.1     | 1.6    | –       |
| 223 Arg | 209 Glu | 76.5   | 97.2    | 46.7   | 75.9    | 400 Arg | 247 Glu | 13.3   | 14.5    | 100.0  | 0.2     |
| 223 Arg | 220 Glu | 92.3   | 91.4    | 94.1   | 92.0    | 400 Arg | 393 Glu | 13.9   | 1.2     | 0.1    | –       |
| 225 Lys | 221 Glu | 59.1   | 51.6    | 51.8   | 52.0    | 426 Glu | 300 Lys | 99.5   | 99.1    | 97.9   | 97.5    |
| 230 Lys | 209 Glu | 1.7    | 1.8     | 0.1    | 7.4     | 454 Glu | 333 Arg | 26.4   | 36.3    | 27.5   | –       |
| 236 Asp | 232 Arg | –      | –       | –      | 19.4    | 454 Glu | 334 Arg | 13.9   | 40.5    | 34.7   | 95.8    |
| 236 Asp | 229 Lys | 1.7    | 3.7     | 0.8    | 78.0    | 456 Lys | 243 Glu | –      | –       | 0.0    | –       |
| 236 Asp | 230 Lys | –      | –       | –      | 4.7     | 456 Lys | 329 Glu | 41.2   | 50.9    | 85.5   | –       |
| 240 Asp | 153 Arg | 91.4   | 22.6    | 17.0   | –       | 456 Lys | 393 Glu | 47.3   | 37.6    | 53.9   | –       |
| 240 Asp | 212 Arg | 0.1    | 6.3     | 95.2   | –       | 456 Lys | 454 Glu | 1.7    | 5.4     | 0.5    | 2.7     |
| 240 Asp | 229 Lys | –      | –       | –      | 1.6     | 458 Arg | 243 Glu | –      | –       | –      | 1.0     |
| 240 Asp | 232 Arg | 100.0  | 99.9    | 100.0  | 71.0    | 458 Arg | 393 Glu | –      | –       | –      | 1.5     |
| 243 Glu | 153 Arg | 99.5   | 51.2    | 100.0  | 0.5     | 458 Arg | 454 Glu | 63.0   | 52.9    | 20.6   | 0.0     |
| 243 Glu | 212 Arg | 19.0   | 82.4    | 100.0  | 1.2     | 461 Asp | 153 Arg | –      | –       | –      | 43.2    |
| 243 Glu | 232 Arg | 7.9    | 4.2     | –      | 46.8    | 461 Asp | 249 Arg | 0.1    | 0.1     | 98.4   | 24.2    |
| 245 Lys | 221 Glu | 48.5   | 83.9    | 7.1    | 9.8     | 461 Asp | 253 Arg | –      | –       | 9.3    | 19.6    |
| 246 Glu | 245 Lys | 15.1   | 1.4     | 15.8   | 20.0    | 462 Glu | 249 Arg | –      | –       | –      | 1.6     |
| 247 Glu | 92 Arg  | 4.9    | –       | –      | –       | 462 Glu | 456 Lys | –      | –       | –      | 12.3    |
| 247 Glu | 153 Arg | 1.4    | 6.8     | 0.1    | 10.9    | 462 Glu | 458 Arg | 98.2   | 91.4    | 99.8   | 85.5    |
| 247 Glu | 212 Arg | 99.6   | 100.0   | 100.0  | 99.4    | 468 Arg | 253 Arg | –      | –       | 12.3   | 0.0     |
| 247 Glu | 232 Arg | –      | –       | –      | 46.6    | 468 Arg | 254 Glu | –      | 0.0     | 39.6   | 88.7    |
| 249 Arg | 221 Glu | 0.1    | 0.7     | –      | 27.7    | 468 Arg | 264 Arg | –      | –       | 1.0    | –       |
| 249 Arg | 246 Glu | 93.3   | 77.5    | 100.0  | 64.8    | 468 Arg | 451 Lys | 59.6   | 55.8    | –      | –       |
| 249 Arg | 247 Glu | –      | –       | –      | 0.1     | 468 Arg | 461 Asp | 8.4    | 10.6    | 1.3    | 3.5     |
| 253 Arg | 221 Glu | 7.7    | –       | –      | 0.1     | 468 Arg | 462 Glu | 0.1    | 0.1     | 9.5    | –       |
| 253 Arg | 246 Glu | 18.0   | 24.0    | –      | 11.5    | 468 Arg | 468 Arg | 83.9   | 73.8    | 80.5   | 71.0    |

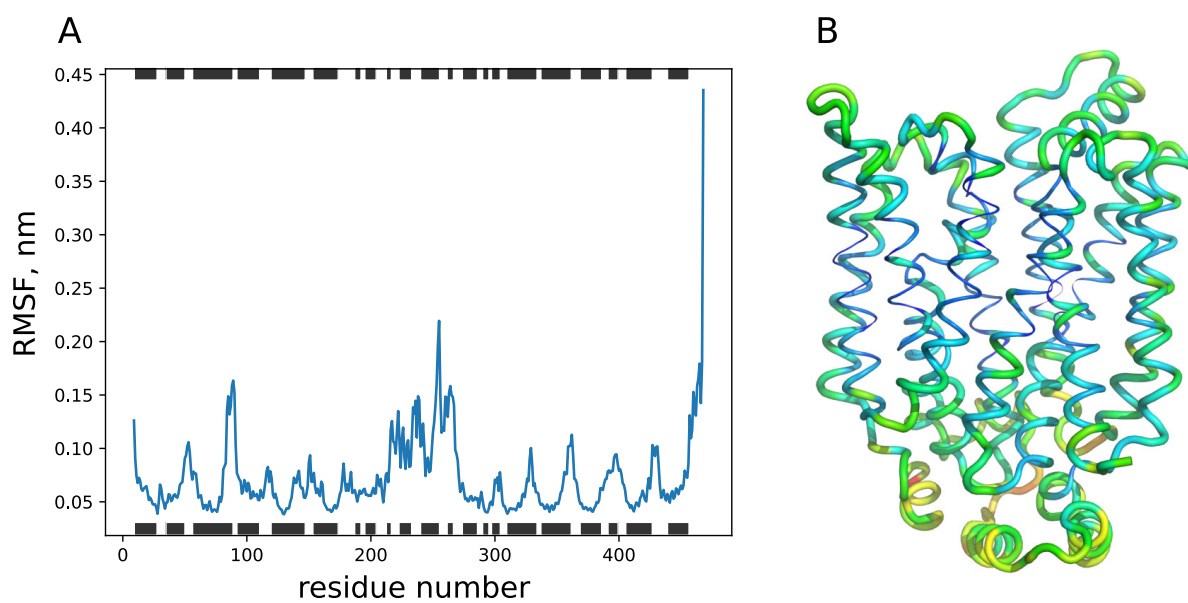

**Figure S2.** The RMSF of C $\alpha$  atoms (A) calculated for the GluT1 conformational transition from IF to OF state (time period 200–400 ns in Fig. S1, blue line) and the residue mobility represented on the protein 3D structure (B). The most pronounced conformational changes are observed for the intra- and extra-cellular parts of the protein.

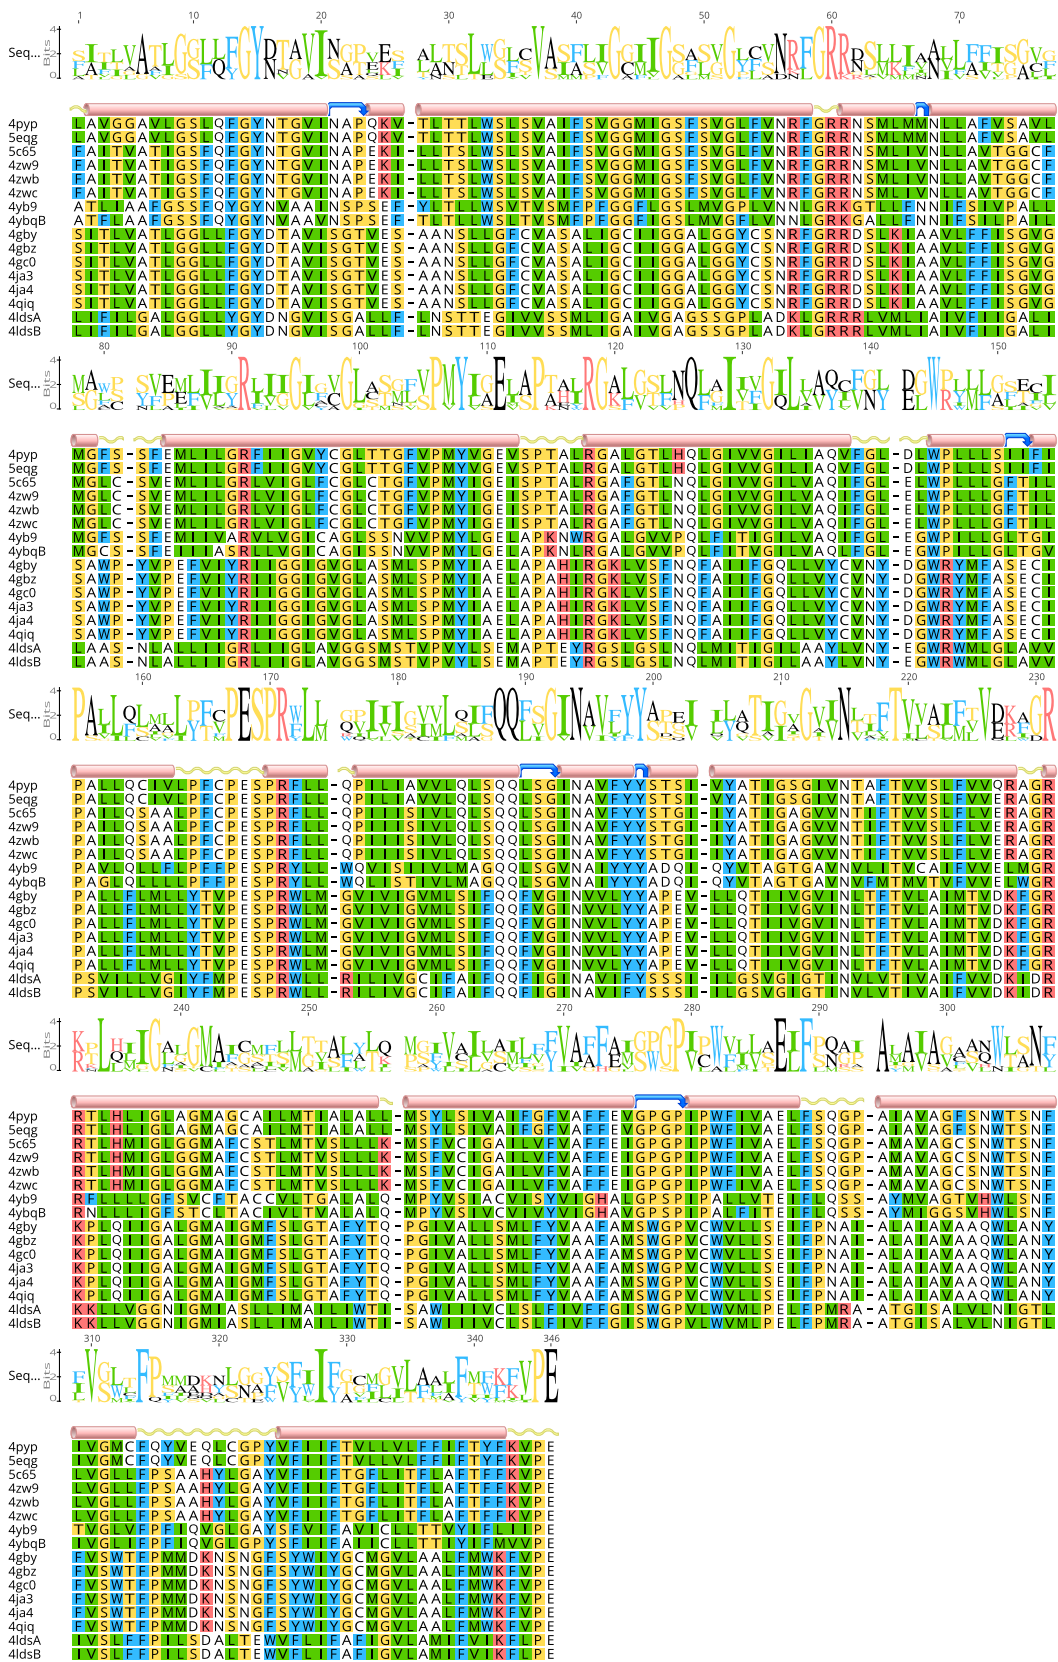

**Figure S3.** Core part alignment of the crystal structures of the MFS SP proteins (Tab. S1). Residues are colored according to Clustal color scheme, rose cylinders indicate the location of  $\alpha$ -helices, connected by the blue arrow if helical fragments make up the same TM helix, yellow strings correspond to the coils between structural fragments.

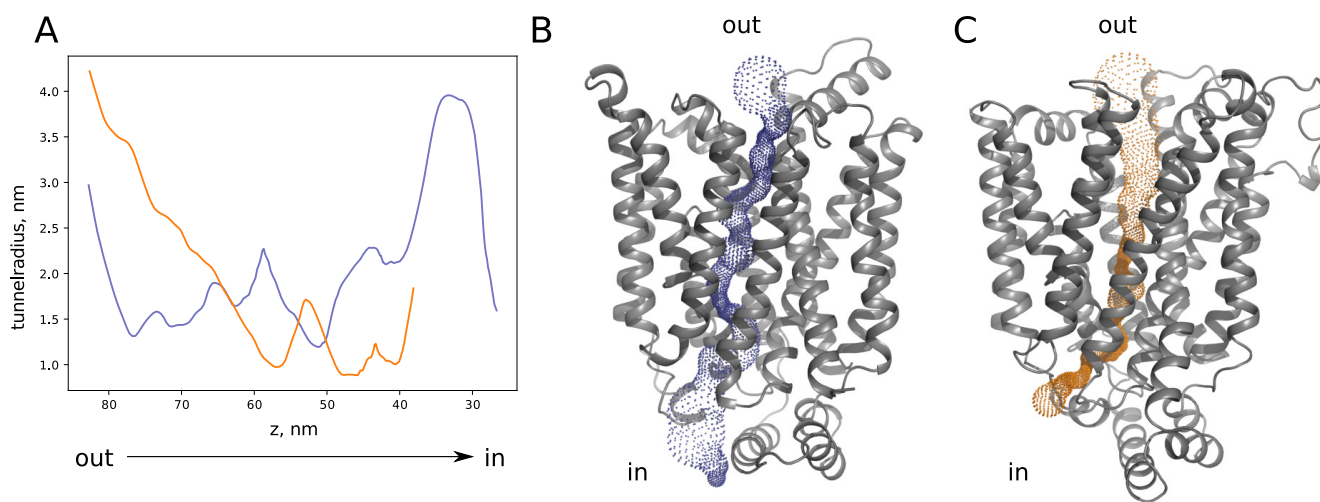

**Figure S4.** The pathway radius as function of z coordinate (A) calculated for the GluT1 outward facing conformer obtained in MD simulations (blue line) compared to that of the X-ray structure 4GBZ of the Xyle outward open conformer (orange line). The corresponding pathways are shown in dots for the GluT1 (B) and Xyle (C) structures. Following the extensive studies of the GluT1 protein cavities done by J. Iglesias-Fernandez et al. (Biophys J, 112, 1176-1184, 2017), we have performed calculations using Caver 3.0 software with spherical probe of 0.8 Å radius, selected with a weighting coefficient of 1, clustering threshold of 12, shell radius of 18 Å, and shell depth of 4 Å.

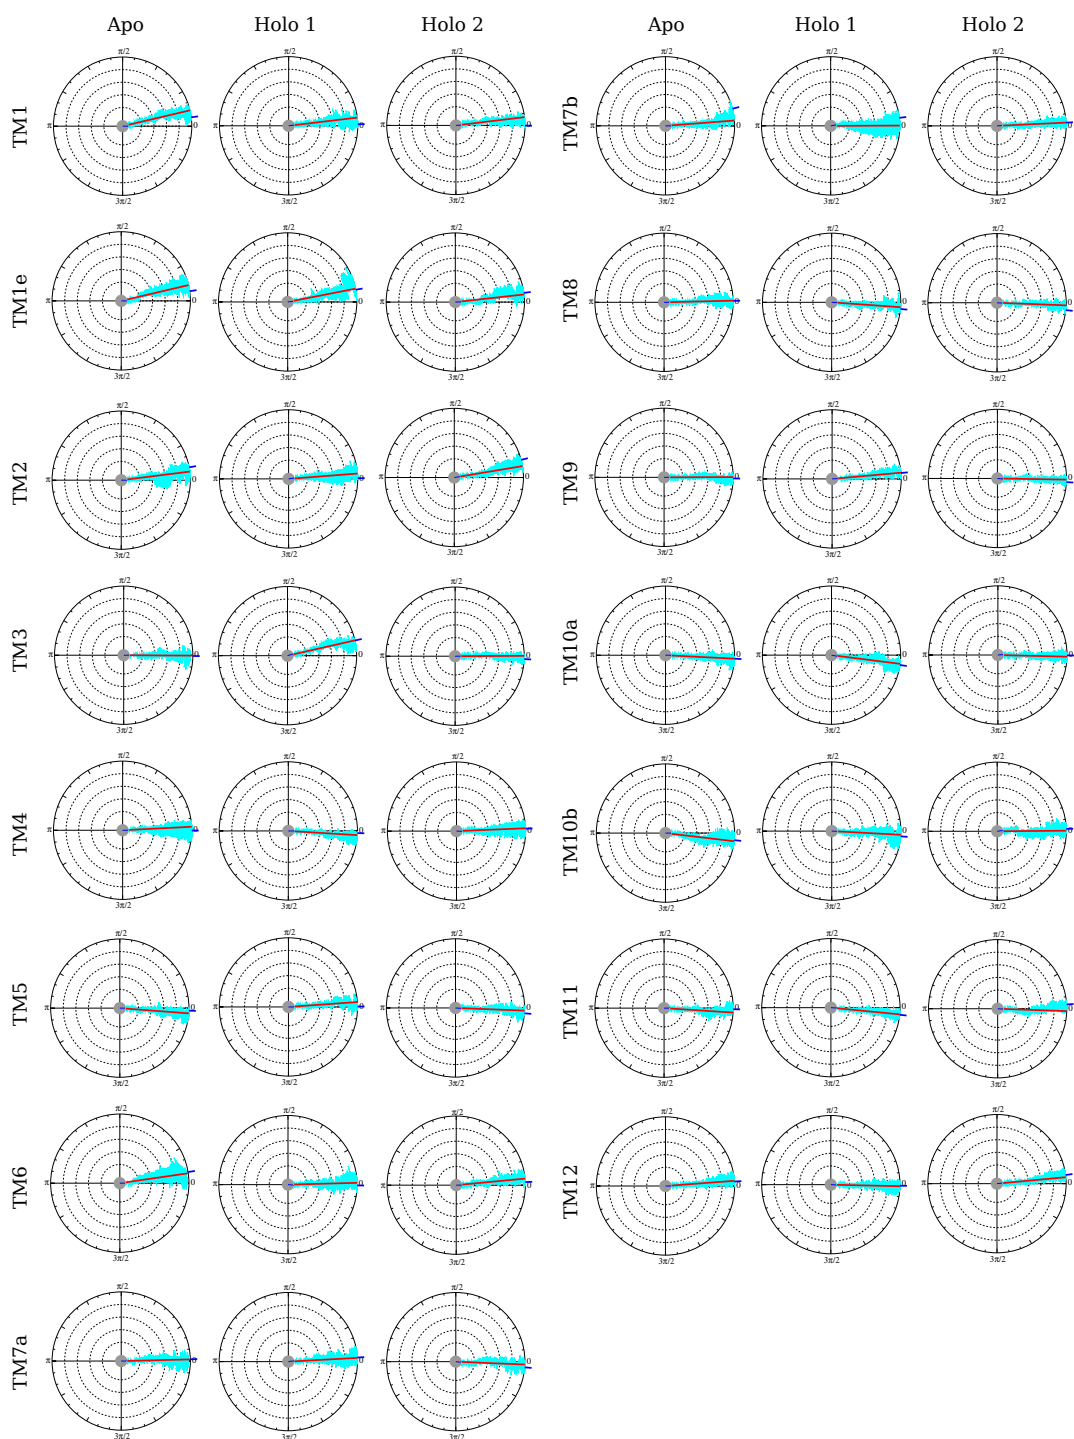

**Figure S5.** Rotation angle of the TM helices around the inertial axis during the MD simulations for GluT1 WT switching from the inward open conformation to the outward facing occluded state (Apo), and for the GluT1 dynamics in the presence of glucose in the outward facing (Holo 1) and inward open (Holo 2) conformations. The angle of rotation was measured in respect to the initial inward open structure. The blue ticks in the origin and on the side of the circle indicate the angle value for the first and last trajectory frames respectively, the red line corresponds to the mean angle value along the trajectory.
